# Supplementary material for: Impact of adult weight management interventions on mental health: a systematic review and meta-analysis protocol
Source: PubMed Central journal article supplement (PMC7045146; doi:10.1136/bmjopen-2019-031857), 2020-01-20
Supplement: bmjopen-2019-031857supp002.pdf [file bmjopen-2019-031857supp002.pdf]

## Supplement B: Search Strategy (Medline)

|                                       |    |                                                                                                                                                                                                                                                                                                                                                                                                                                                                                                                            |
|---------------------------------------|----|----------------------------------------------------------------------------------------------------------------------------------------------------------------------------------------------------------------------------------------------------------------------------------------------------------------------------------------------------------------------------------------------------------------------------------------------------------------------------------------------------------------------------|
| (1)<br>Participants                   | 1. | exp Overweight/ or exp Obesity/ or (adipos* or obes* or over?weight).tw                                                                                                                                                                                                                                                                                                                                                                                                                                                    |
| (2)<br>Weight management intervention | 2. | exp Body Weight/ or exp Life Style/ or exp Physical Activity/ or exp Obesity Management/ or exp Diet Therapy/ or exp Exercise/ or exp Diet/ or exp Behavior Therapy/ or exp Health Education/ or ((weight adj3 (body or chang* or los* or maint* or manage* or control* or reduc*)) or (body?mass?index or bmi) or (body adj3 mass) or life?style or (diet* or nutrition*) or (physic* adj3 (activ* or fit*)) or exercis* or (obes* adj3 (intervention or program* or camp* or treat*)) or (behavio?r* or psych*)).tw      |
| (3)<br>Mental health outcomes         | 3. | exp Behavioral Symptoms/ or exp Emotions/ or exp Mental Disorders/ or exp Adaptation, Psychological/ or exp Mental Health/ or exp Quality of Life/ or exp Self Concept/ OR (depress* or anxiet* or well?being or (quality?of?life or qol or health?status) or (affect* or mood*) or (health?related?quality?of?life or hrqol) or emotion* or (mental adj3 (health or well?being)) or (psych* adj3 (well?being or health)) or self?esteem or self?image or body?image or stress* or (emot* adj3 eating) or binge?eating).tw |
| (4)<br>Study design                   | 4. | exp Randomized Controlled Trials as Topic/ or randomized controlled trial.pt or controlled clinical trial.mp or randomi?ed.mp or randomly.mp or trial.mp                                                                                                                                                                                                                                                                                                                                                                   |
|                                       | 5. | 1 AND 2 AND 3 AND 4                                                                                                                                                                                                                                                                                                                                                                                                                                                                                                        |

Limit (5) to English-language results.
